# Supplementary material
Source: PubMed Central journal article supplement (PMC2879069)
Supplement: NIHMS182767-supplement-01.pdf [file NIHMS182767-supplement-01.pdf]

### **Supplementary Table 1**

#### **MiRNA profiling results in islet, adipose tissue and liver collected from B6-lean, B6-ob/ob, BTBR-lean and BTBR-ob/ob mice.**

Pancreatic islet, adipose tissue, and liver were harvested and miRNA measurements performed by LNA-based RT-PCR profiling. The miRNA abundance is shown as copy number/cell. Pools of RNA samples were used for the islet profiling, whereas 5 individuals were profiled for the adipose tissue and liver. MiRNAs are ordered by relative abundance, showing that miR-211 was the most abundant miRNA in all 3 tissues.

### **Supplementary Table 2**

#### **Taqman-based real time PCR measurement on 10 individual islet samples confirms majority of LNA-based profiling results for selected miRNAs.**

MiRNA from the pooled islet samples which showed significant changes from LNA-based PCR profiling results were subsequently measured by Taqman-based PCR on 10 individual samples of B6-lean, B6-ob/ob, BTBR-lean and BTBR-ob/ob mice. MiRNA expression values are shown as  $\Delta$ CT normalized to SnoRNA234 (a house-keeping, small nucleolar RNA molecule)  $\pm$  standard deviation. Correlation shows the Pearson's correlation between the Taqman individual measurements and the LNA pooled measurements for the miRNAs selected. Expression profiles across the 4 experimental groups between Taqman and LNA PCR methods were highly correlated, except for

miR-214.

### **Supplementary Table 3**

#### **Genomic location and position of hepatic miR-eQTL for 21 miRNAs.**

Twenty-one miRNAs which showed significant linkage in F2 liver are listed according to their LOD score. The genomic location and position of the QTL loci are provided. *Cis*-mapping miRNAs are indicated by \*; all other miRNAs map in *trans*. # indicates the two miRNAs (let-7c and miR-16) that derive from more than one genomic location. As these both map in *trans*, we cannot distinguish which genomic position contributed to the QTL.
