# Supplementary material
Source: PubMed Central journal article supplement (PMC2879069)
Supplement: NIHMS182767-supplement-Suppl-Tabl-3.pdf [file NIHMS182767-supplement-Suppl-Tabl-3.pdf]

### Supplementary Table 3

Zhao et al., 2009

#### Genomic location and position of hepatic miR-eQTL for 21 miRNAs.

| miRNA      | genome location |           |           |        | miR-eQTL |        |         |
|------------|-----------------|-----------|-----------|--------|----------|--------|---------|
|            | Chr             | start bp  | stop bp   | strand | Chr      | cM     | LOD     |
| miR-214    | 1               | 164153499 | 164153608 | +      | 17       | 2.15   | 16.26   |
| miR-34a    | 4               | 149442563 | 149442664 | +      | 4        | 94.01  | 13.00 * |
| miR-451    | 11              | 77886672  | 77886743  | +      | 9        | 74.30  | 9.96    |
| miR-31     | 4               | 88556461  | 88556566  | -      | 4        | 51.73  | 9.56 *  |
| miR-338    | 11              | 119876079 | 119876176 | -      | 6        | 46.495 | 7.42    |
| miR-145    | 18              | 61807479  | 61807548  | -      | 17       | 30.55  | 6.96    |
| miR-205    | 1               | 195333657 | 195333724 | -      | 7        | 0.00   | 6.57    |
| miR-200b   | 4               | 155429790 | 155429859 | -      | 12       | 7.27   | 6.36    |
| let-7c-1   | 16              | 77599902  | 77599995  | +      | 8        | 17.61  | 6.02 #  |
| let-7c-2   | 15              | 85537033  | 85537127  | +      |          |        |         |
| miR-295    | 7               | 3220774   | 3220842   | +      | 7        | 0.00   | 5.25 *  |
| miR-142-3p | 11              | 87570366  | 87570429  | +      | 9        | 56.81  | 6.57    |
| miR-148a   | 6               | 51219811  | 51219909  | -      | 12       | 17.97  | 5.04    |
| let-7b     | 15              | 85537749  | 85537833  | +      | 8        | 17.36  | 5.74    |
| miR-16-1   | 14              | 62250717  | 62250809  | -      | 12       | 16.95  | 5.95 #  |
| miR-16-2   | 3               | 68813824  | 68813918  | +      |          |        |         |
| miR-331    | 10              | 93426513  | 93426608  | -      | 12       | 7.92   | 5.82    |
| miR-141    | 6               | 124667932 | 124668003 | -      | 12       | 17.97  | 5.68    |
| miR-346    | 14              | 35707795  | 35707892  | +      | 9        | 79.23  | 5.46    |
| miR-190    | 9               | 67084467  | 67084533  | -      | 8        | 57.45  | 5.44    |
| miR-181c   | 8               | 86702772  | 86702860  | -      | 12       | 11.14  | 5.40    |
| miR-195    | 11              | 70048544  | 70048637  | +      | 12       | 20.00  | 5.36    |
| miR-143    | 18              | 61808850  | 61808912  | -      | 5        | 18.47  | 5.31    |

Notes:

\* indicates cis-acting regulation; other miRNAs were trans-acting.

# indicates mature miRNAs that potentially derive from two different genomic locations.
