# Supplementary material
Source: PubMed Central journal article supplement (PMC2879069)
Supplement: NIHMS182767-supplement-Suppl-Tbl-2.pdf [file NIHMS182767-supplement-Suppl-Tbl-2.pdf]

## Supplementary Table 2

Zhao et al., 2009

Taqman-based real time PCR measurement on 10 individual islet samples confirms majority of LNA-based profiling results for selected miRNAs.

| miRNA name | B6 mice      |              |       |         | BTBR mice    |              |       |         | correlation |
|------------|--------------|--------------|-------|---------|--------------|--------------|-------|---------|-------------|
|            | lean         | <i>ob/ob</i> | FC    | p-value | lean         | <i>ob/ob</i> | FC    | p-value |             |
| mir-34a    | -5.68 ± 0.35 | -4.45 ± 0.27 | 2.3   | NS      | -5.43 ± 0.29 | -3.43 ± 0.33 | 4     | 0.0043  | 1.00        |
| mir-132    | -1.96 ± 0.10 | 1.29 ± 0.06  | 9.5   | 6.3E-15 | -1.56 ± 0.09 | 0 ± 0.12     | 2.9   | 1.3E-07 | 1.00        |
| mir-212    | -5.46 ± 0.16 | -1.73 ± 0.11 | 13.3  | 3.2E-12 | -5.06 ± 0.13 | -3.10 ± 0.24 | 3.9   | 1.7E-05 | 1.00        |
| mir-184    | -3.27 ± 0.12 | -8.53 ± 0.12 | -38.3 | 4.8E-09 | -3.57 ± 0.16 | -9.73 ± 0.39 | -71.5 | 2.1E-07 | 0.94        |
| mir-211    | -6.16 ± 0.23 | -5.94 ± 0.12 | 1.2   | NS      | -5.93 ± 0.15 | -7.88 ± 0.24 | -3.9  | 4.0E-05 | 0.97        |
| mir-152    | -1.20 ± 0.10 | 0.17 ± 0.07  | 2.6   | 3.2E-08 | -0.84 ± 0.08 | -0.15 ± 0.12 | 1.6   | 0.0032  | 0.99        |
| mir-27b    | 0.12 ± 0.10  | -0.94 ± 0.06 | -2.1  | 6.9E-07 | 0.20 ± 0.13  | -1.04 ± 0.15 | -2.4  | 0.0002  | 0.72        |
| mir126-5p  | -2.08 ± 0.09 | -1.42 ± 0.09 | 1.6   | 0.0007  | -1.98 ± 0.09 | -1.62 ± 0.17 | 1.3   | NS      | 0.96        |
| mir-214    | -7.04 ± 0.22 | -6.11 ± 0.14 | 1.9   | 0.0416  | -6.75 ± 0.21 | -5.73 ± 0.22 | 2     | 0.0524  | -0.29       |
